# Supplementary material for: Loss of MBNL1 induces RNA misprocessing in the thymus and peripheral blood
Source: PubMed Central journal article supplement (PMC7181699; doi:10.1038/s41467-020-15962-x), 2020-04-24
Supplement: 41467_2020_15962_MOESM4_ESM.pdf [file 41467_2020_15962_MOESM4_ESM.pdf]

## **Description of Additional Supplementary Files**

File Name: Supplementary Data 1

Description: Supplementary Data 1 file contains primer and siRNA sequences used in this study, detailed information about RNA-seq samples, and all results used for graph generation in the main text as well as the Supplementary Information file.
