# Supplementary material for: Loss of MBNL1 induces RNA misprocessing in the thymus and peripheral blood
Source: PubMed Central journal article supplement (PMC7181699; doi:10.1038/s41467-020-15962-x), 2020-04-24
Supplement: 41467_2020_15962_MOESM6_ESM.pdf [file 41467_2020_15962_MOESM6_ESM.pdf]

Source File

Loss of MBNL1 induces RNA mis-processing  
in the thymus and peripheral blood

Ł. J. Sznajder et al.

**Fig. 3g**

Lef1 E6

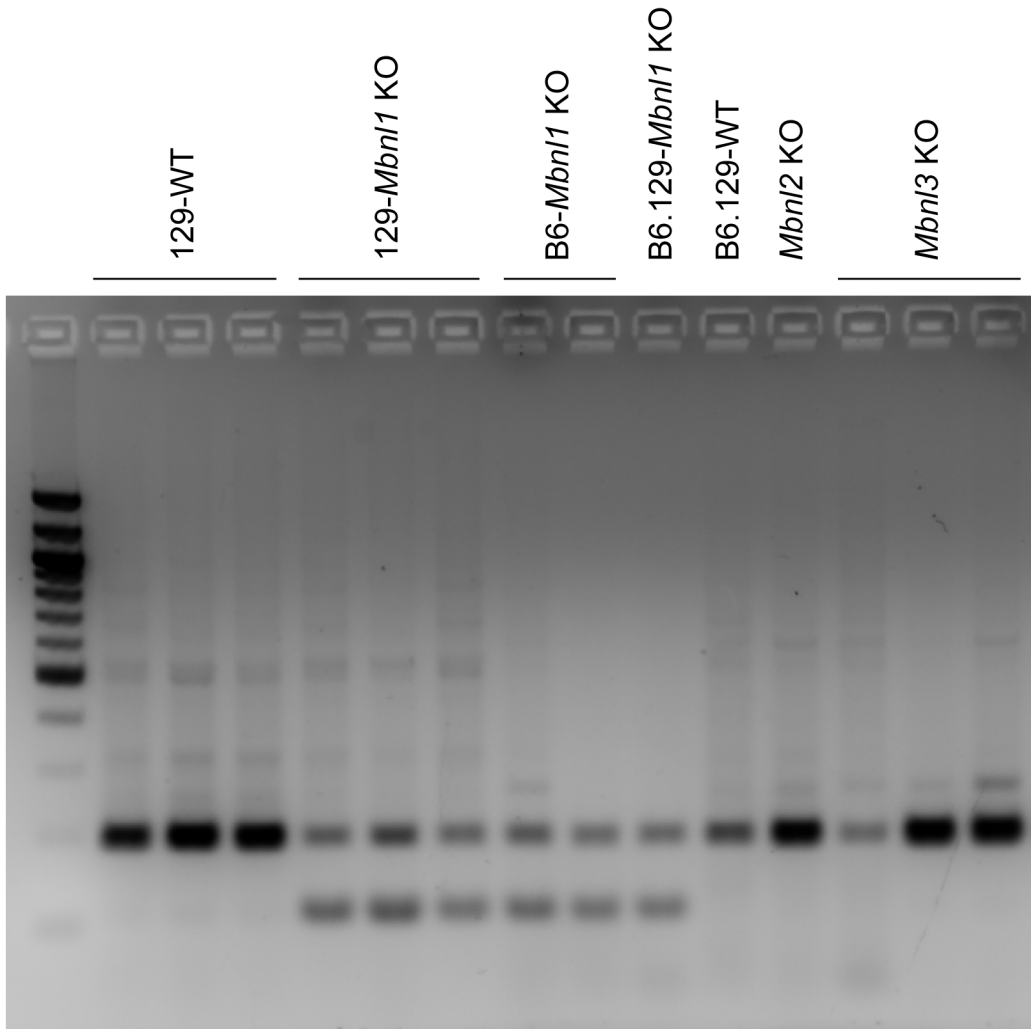

Lef1: 205 bp (+E6); 121 bp (-E6)

**Fig. 4a**

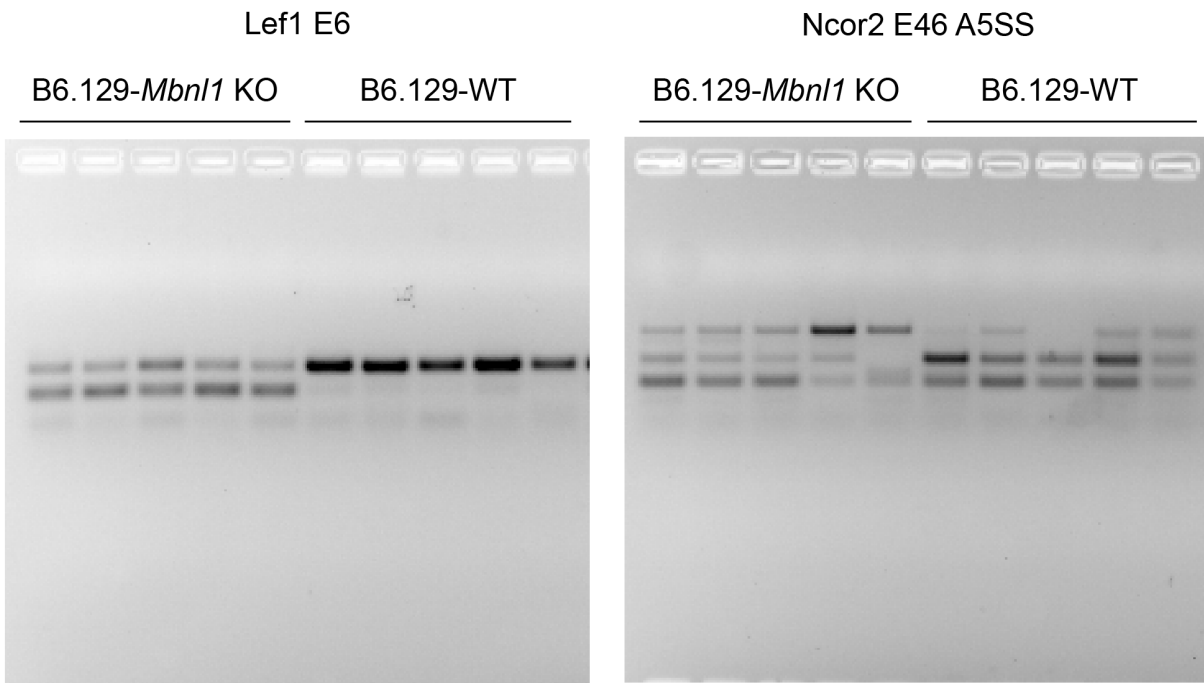

Lef1: 205 bp (+E6); 121 bp (-E6)  
Ncor2: 368 bp (+E46L); 227 bp (+E46S); 140 bp (-E46)

**Fig. 5a**

CNBP-IR

DM2

DM1

Ctrl.

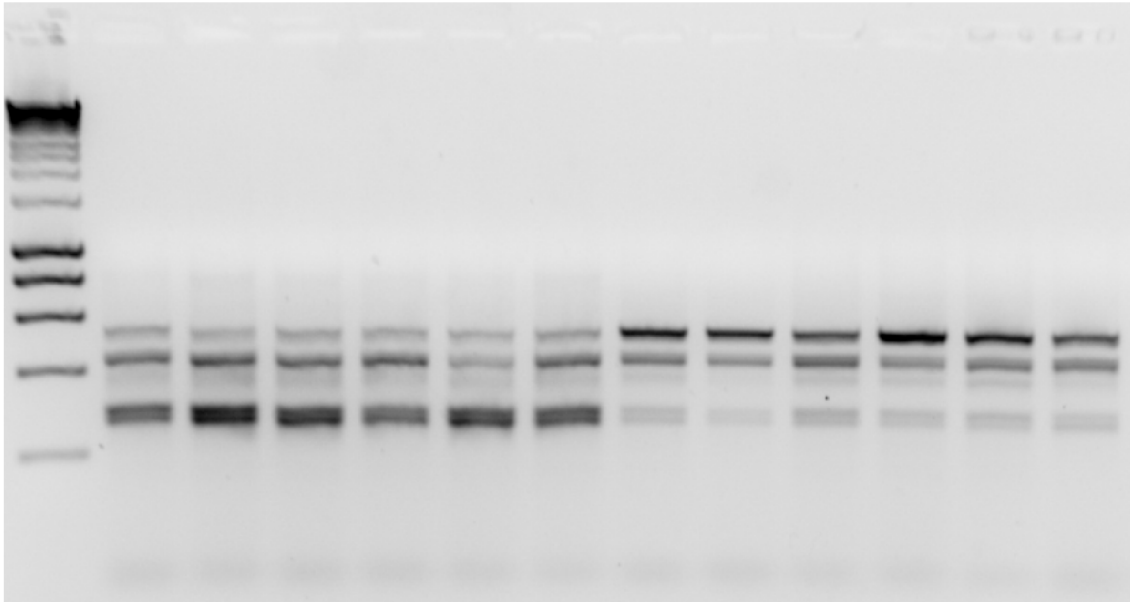

CNBP-IR: 553 bp (pre-mRNA; I1-E2-I2-E3-I3-E4);  
458 bp (intermediate; I1-E2-E3-I3-E4); 296 bp (CNBP-IR; I1-E2-E3-E4)



**Fig. 5g**

LEF1 E6

DM2

DM1

Ctrl.

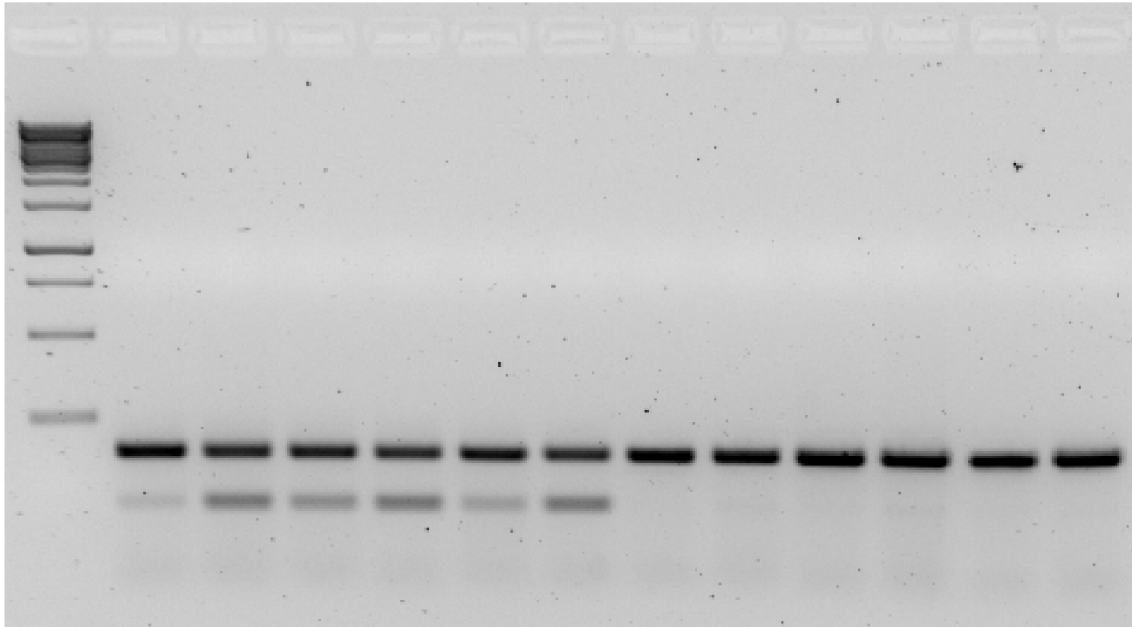

LEF1: 185 bp (+E6); 101 bp (-E6)

### Supplementary Fig. 1c

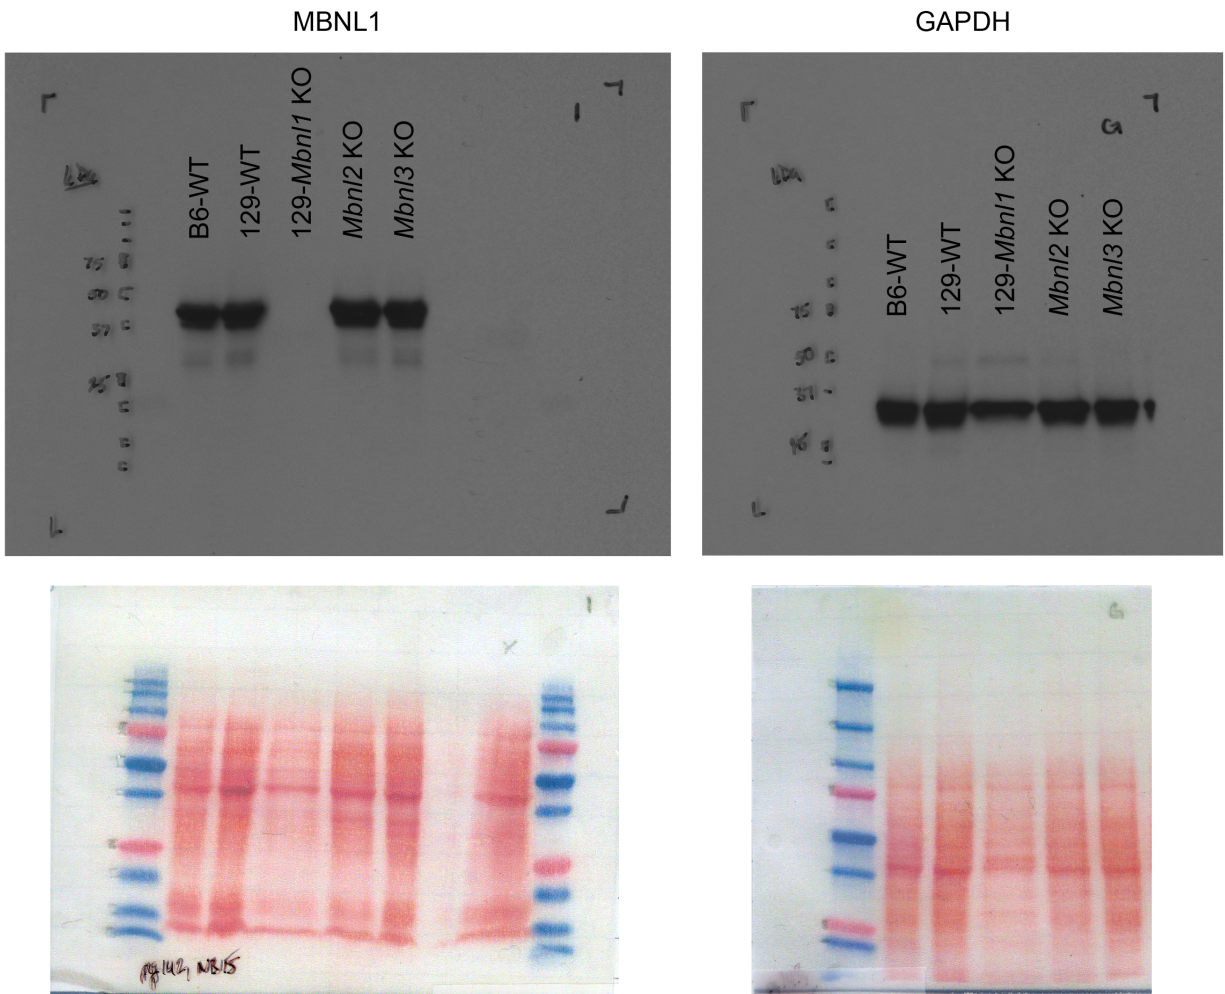

Primary antibodies: anti-MBNL1 A2764 (a gift from Dr. Charles Thornton, 1:5,000) and anti-GAPDH 6c5 (Abcam CN: ab8245, 1:10,000).

**Supplementary Fig. 4b**

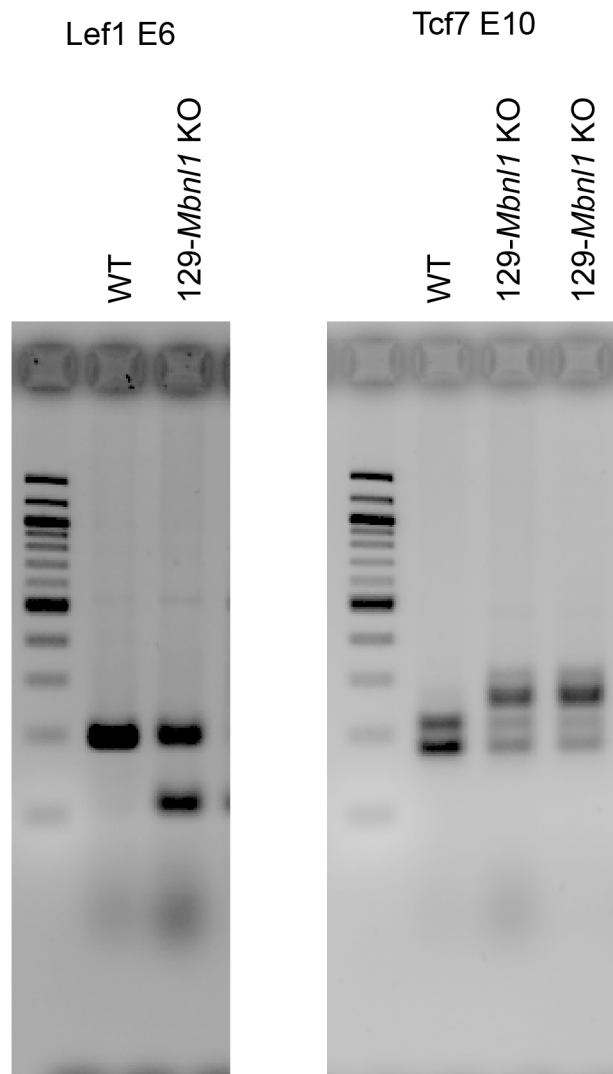

Lef1: 205 bp (+E6); 121 bp (-E6)  
Tcf7: 277 bp and 254 bp (+E10); 204 bp and 181 bp (-E10)

Supplementary Fig. 4d

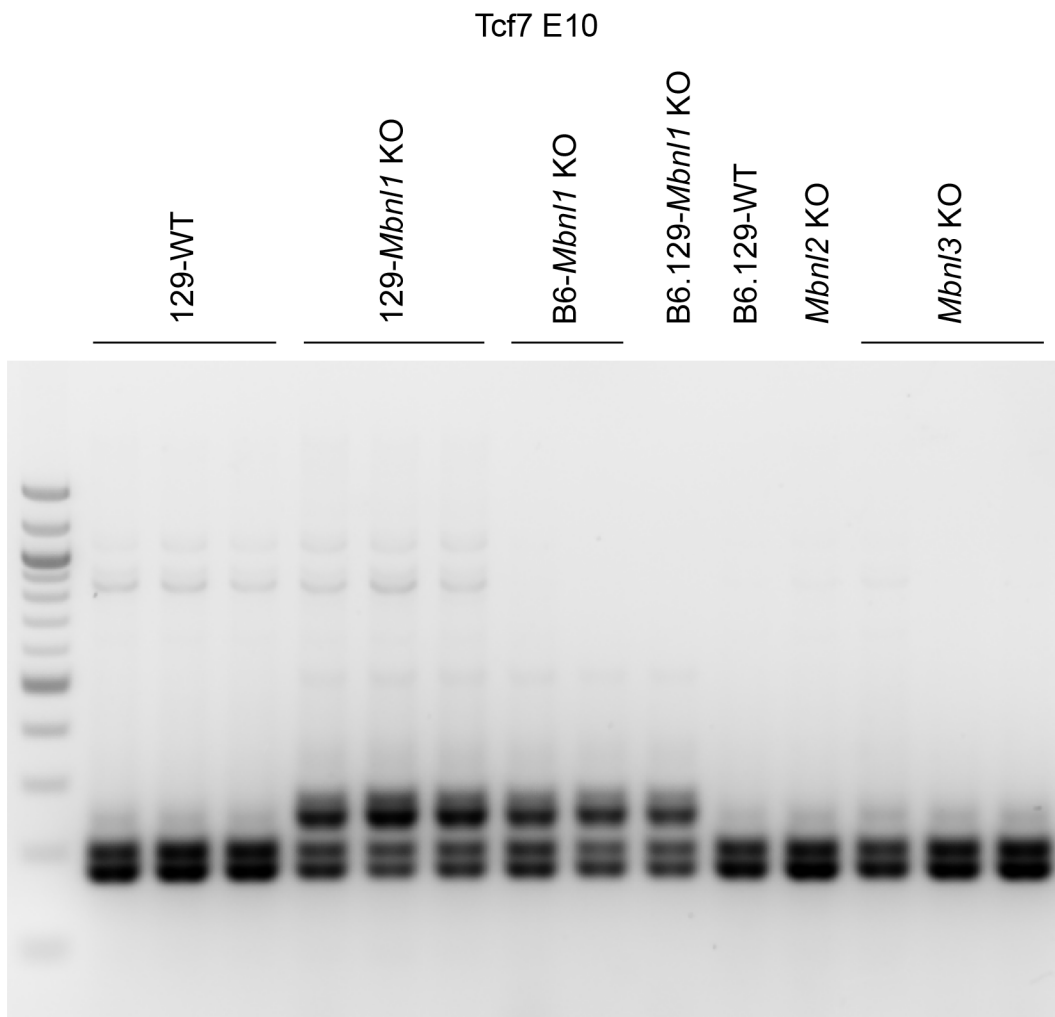

Tcf7: 277 bp and 254 bp (+E10); 204 bp and 181 bp (-E10)

Supplementary Fig. 4e

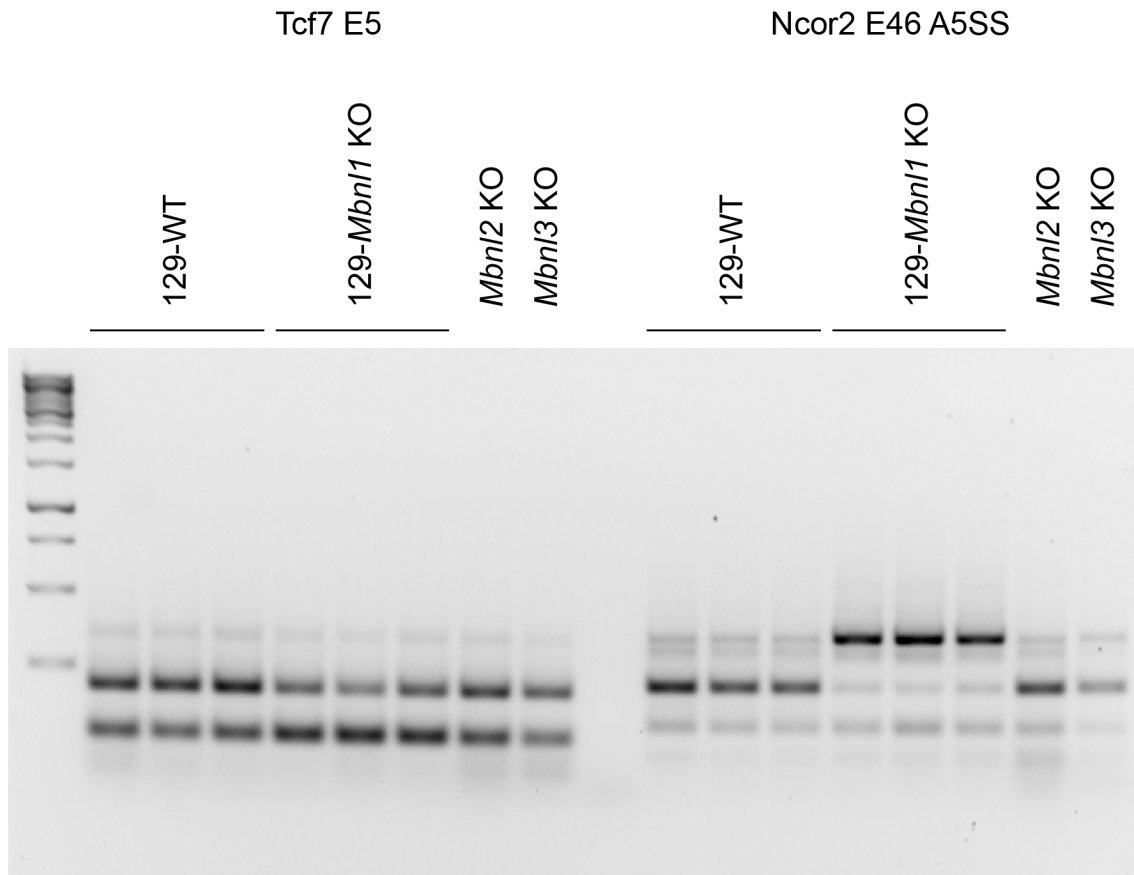

Tcf7: 206 bp (+E5); 113 bp (-E5)  
Ncor2: 368 bp (+E46L); 227 bp (+E46S); 140 bp (-E46)

Supplementary Fig. 4e

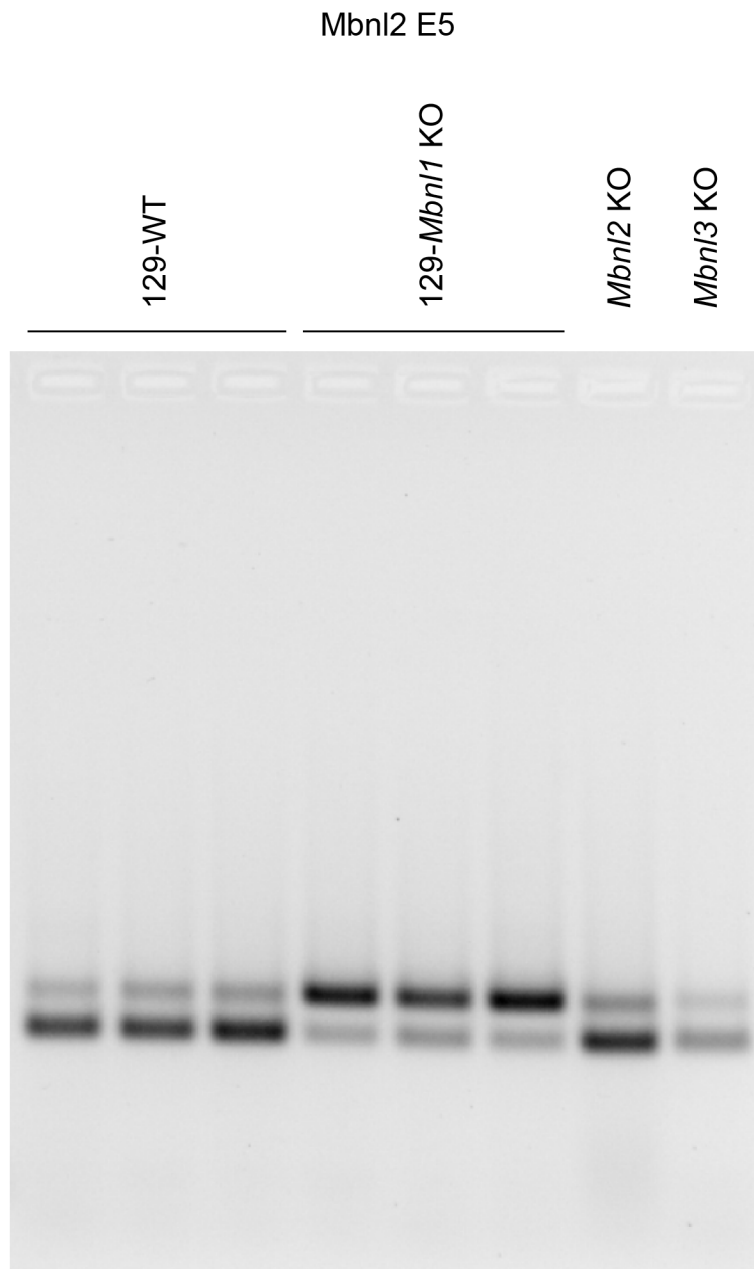

Mbnl2: 255 bp (+E5); 201 bp (-E5)

**Supplementary Fig. 4i**

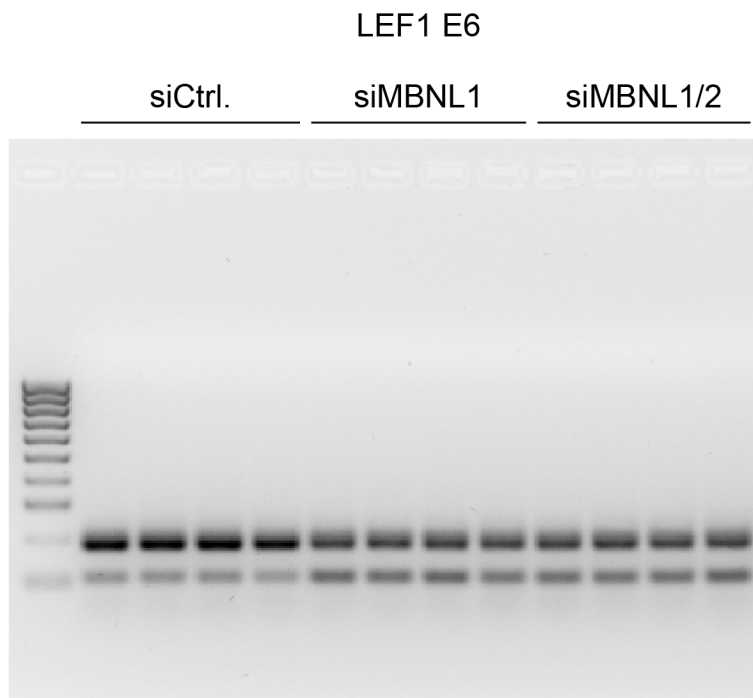

LEF1: 185 bp (+E6); 101 bp (-E6)

**Supplementary Fig. 4i**

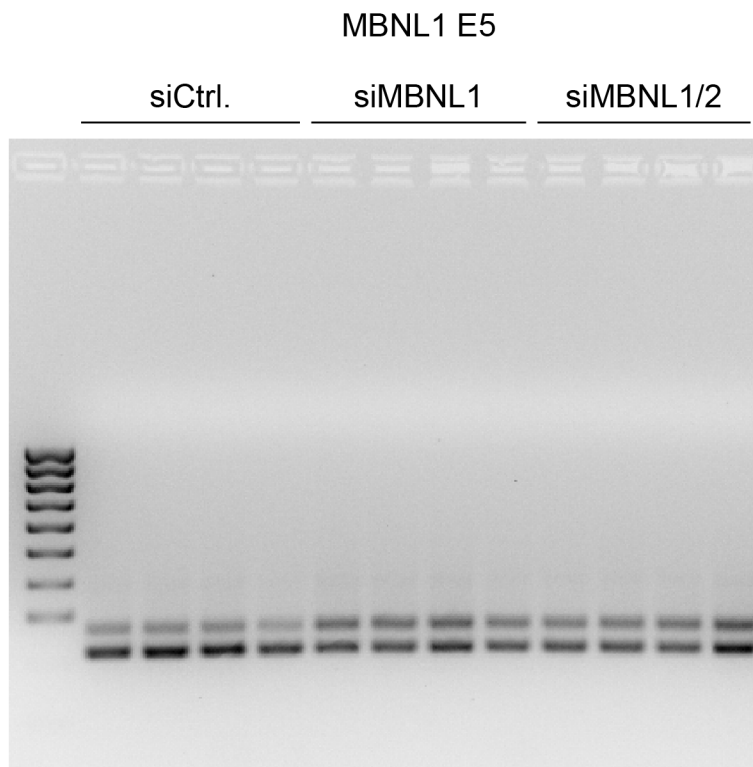

MBNL1: 270 bp (+E10); 216 bp (-E10)



**Supplementary Fig. 4i**

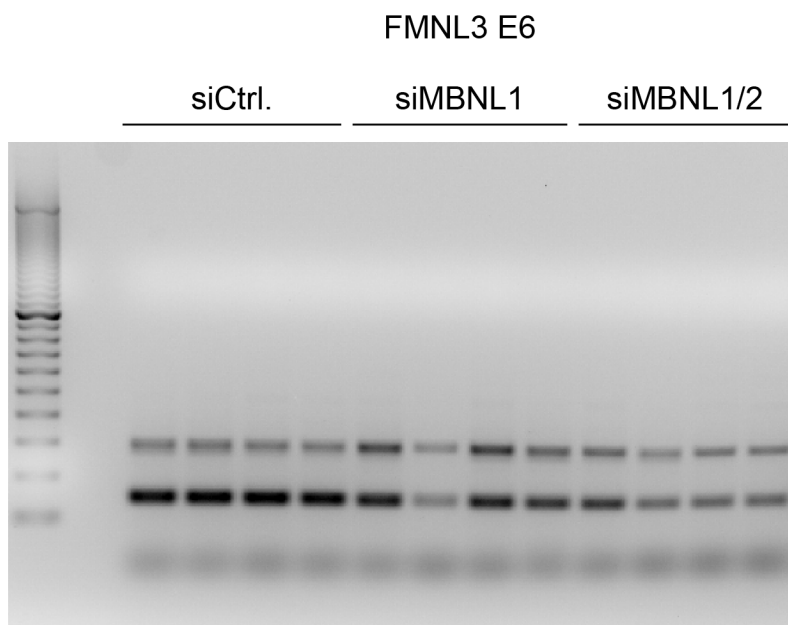

FMNL3: 303 bp (+E6); 150 bp (-E6)

**Supplementary Fig. 4i**

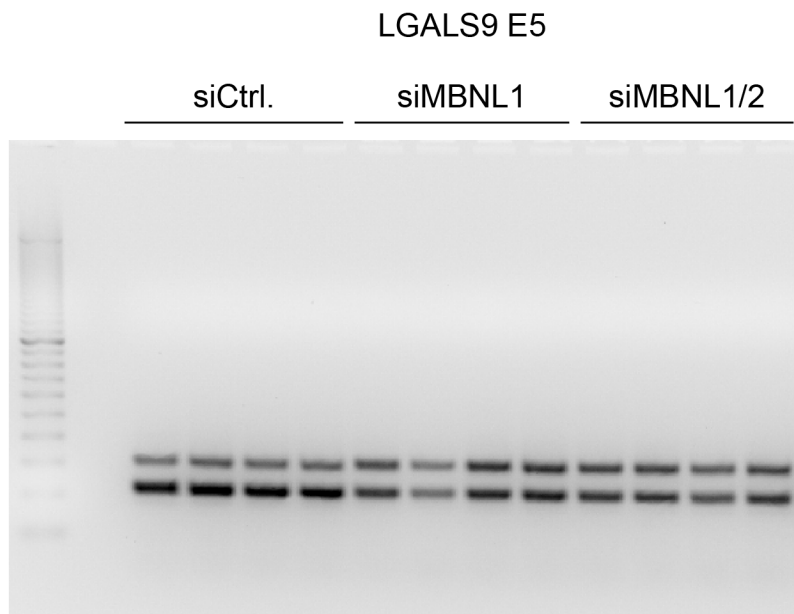

LGALS9: 318 bp (+E5); 222 bp (-E5)

**Supplementary Fig. 4i**

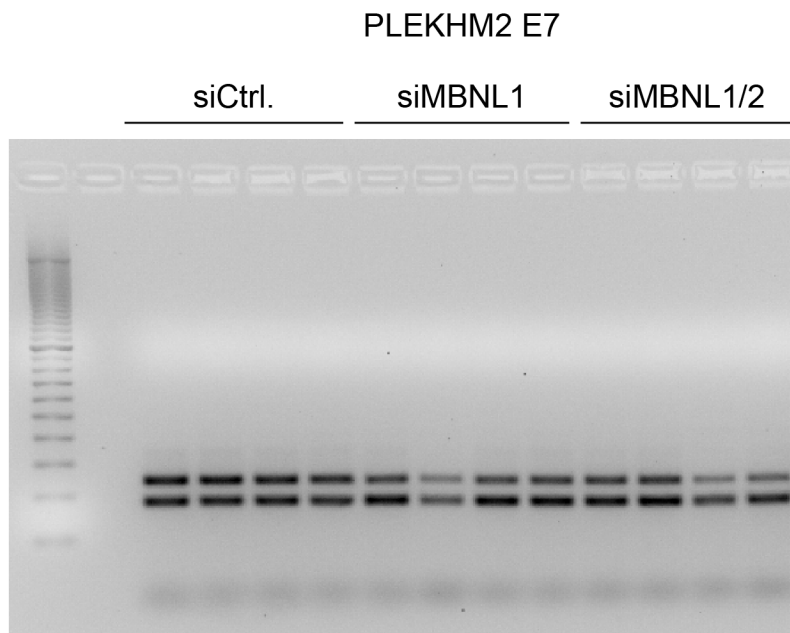

**Supplementary Fig. 4i**

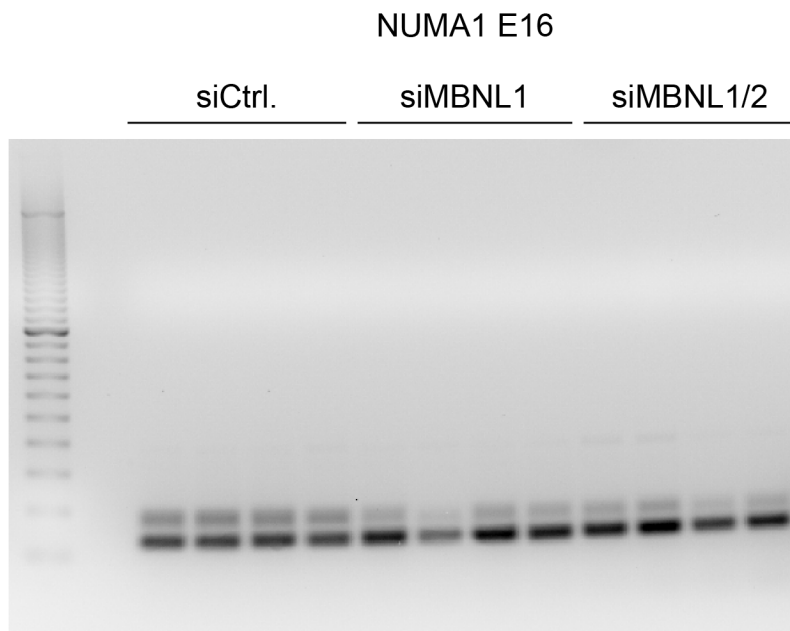

NUMA1: 184 bp (+E6); 142 bp (-E6)

**Supplementary Fig. 4i**

NUMB E12

siCtrl.

siMBNL1

siMBNL1/2

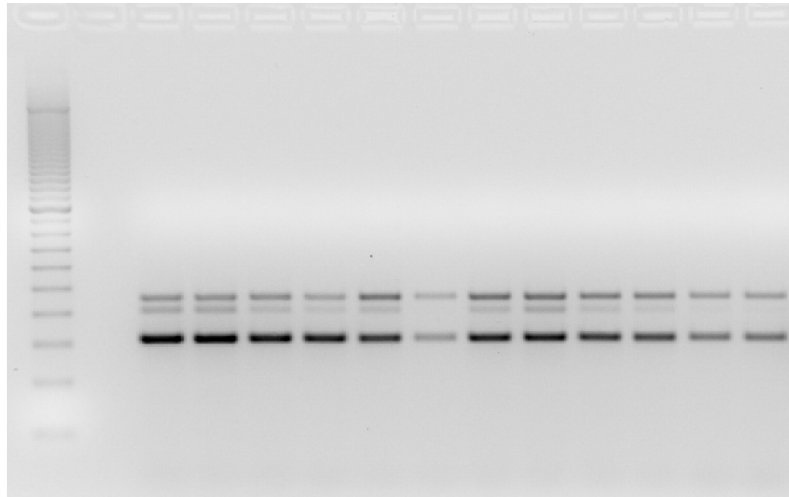

NUMB: 459 bp (+E12); 315 bp (-E12)

**Supplementary Fig. 4i**

SYNE1 E137

siCtrl.

siMBNL1

siMBNL1/2

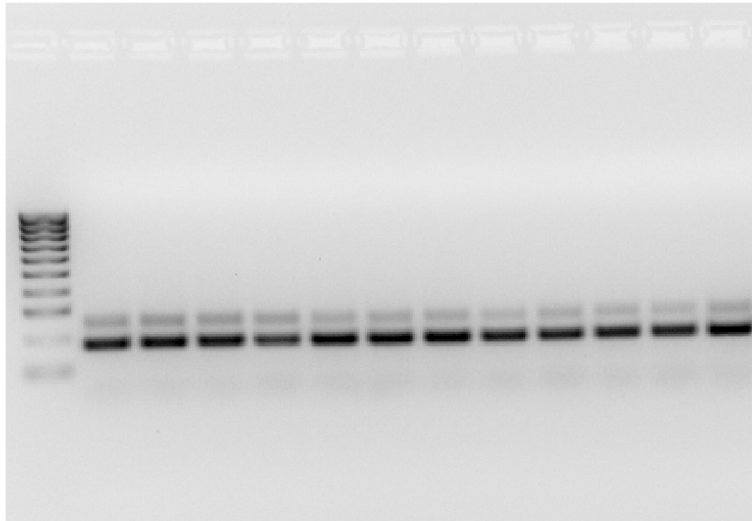

SYNE1: 245 bp (+E137); 176 bp (-E137)

**Supplementary Fig. 4i**

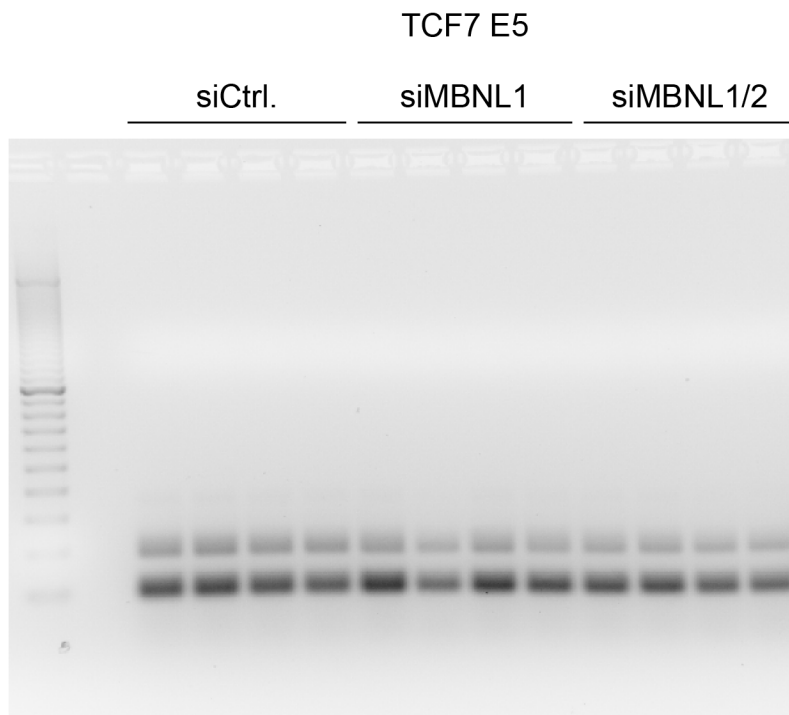

TCF7: 192 bp (+E5); 100 bp (-E5)

**Supplementary Fig. 4i**

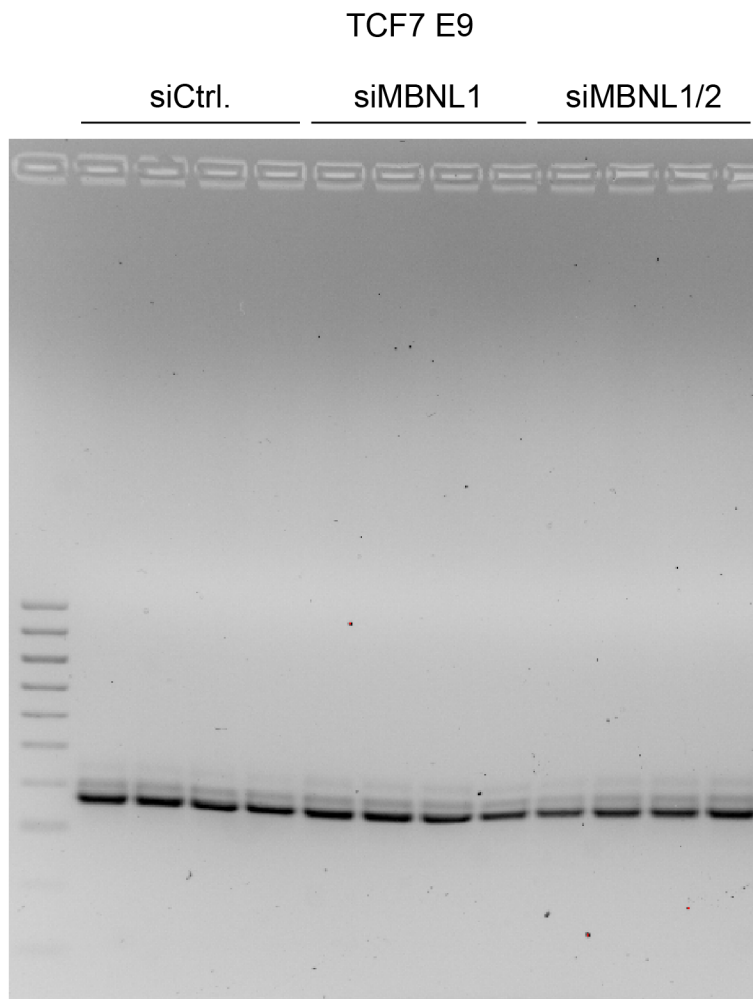

TCF7: 466 bp (+E9); 393 bp and 370 bp (-E9)



Supplementary Fig. 5a

Lef1 E6

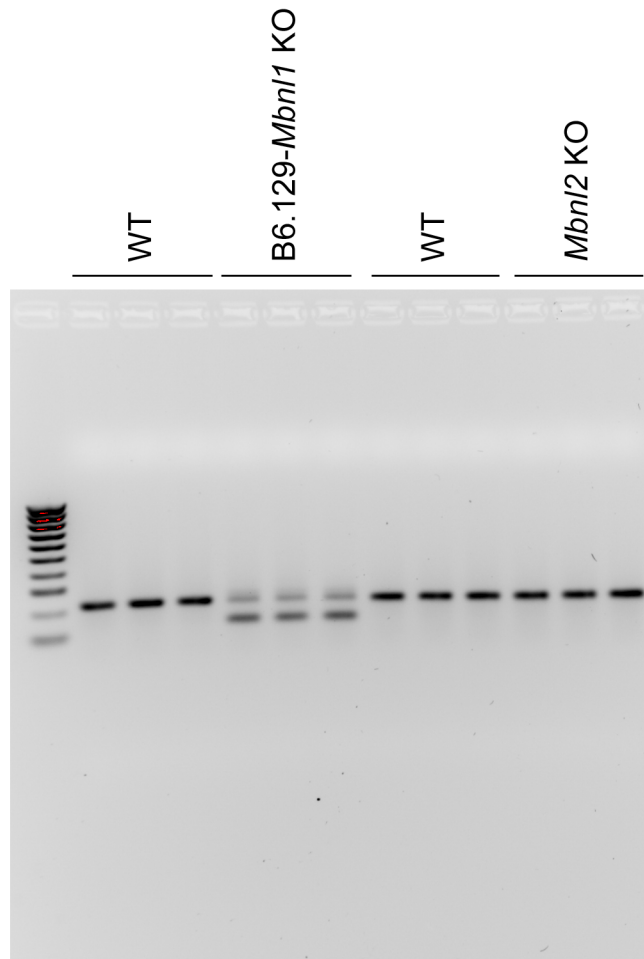

Lef1: 205 bp (+E6); 121 bp (-E6)

Supplementary Fig. 5a

Tcf7 E5

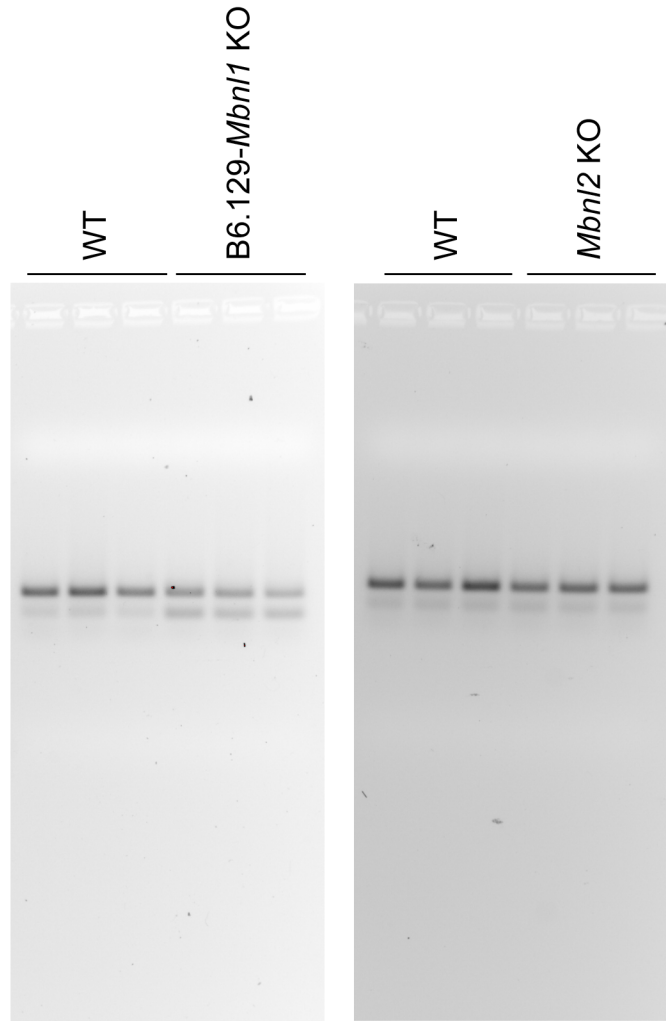

Tcf7: 206 bp (+E5); 113 bp (-E5)

Supplementary Fig. 5a

Tcf7 E10

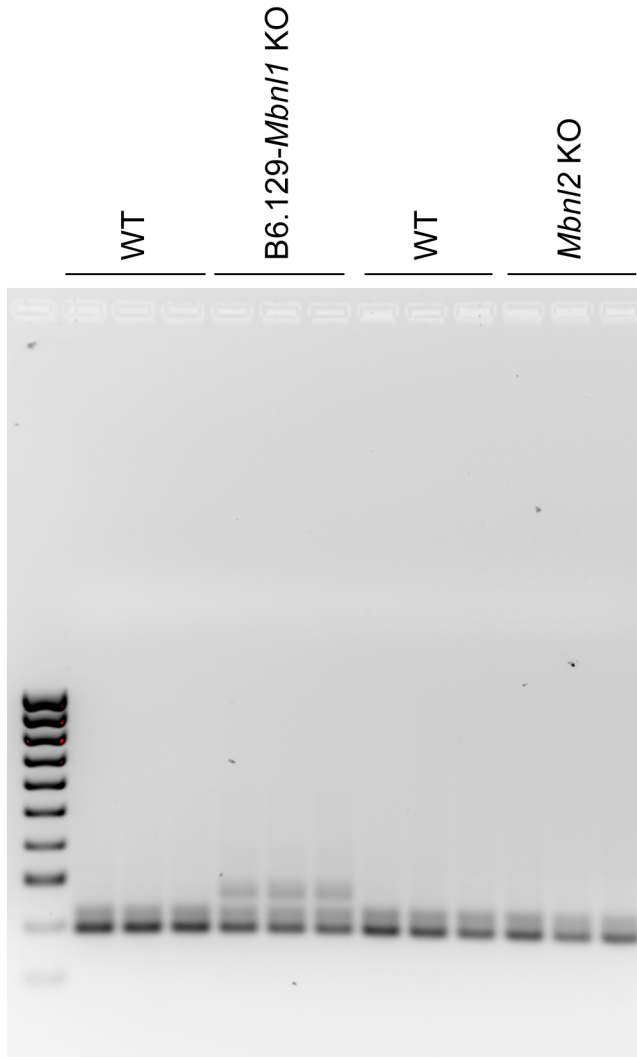

Tcf7: 277 bp and 254 bp (+E10); 204 bp and 181 bp (-E10)

Supplementary Fig. 5c

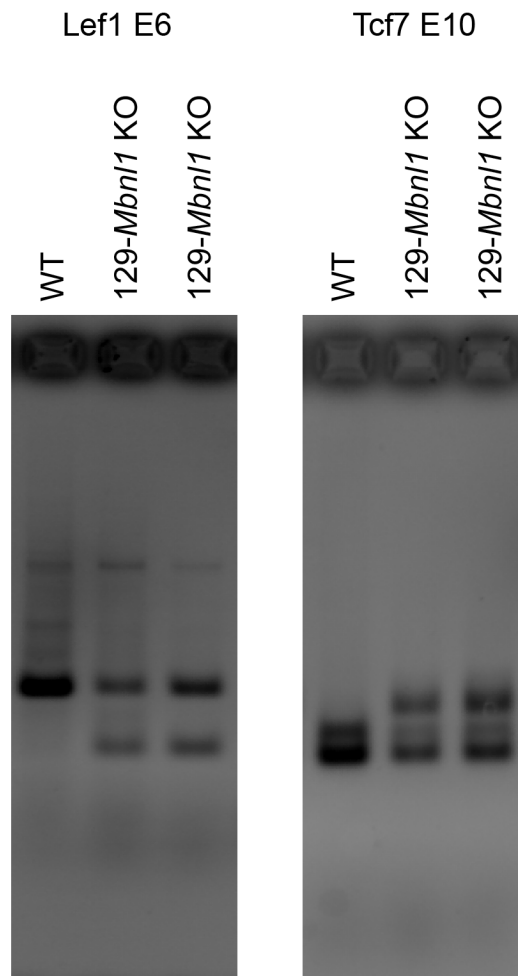

Lef1: 205 bp (+E6); 121 bp (-E6)  
Tcf7: 277 bp and 254 bp (+E10); 204 bp and 181 bp (-E10)

**Supplementary Fig. 5d**

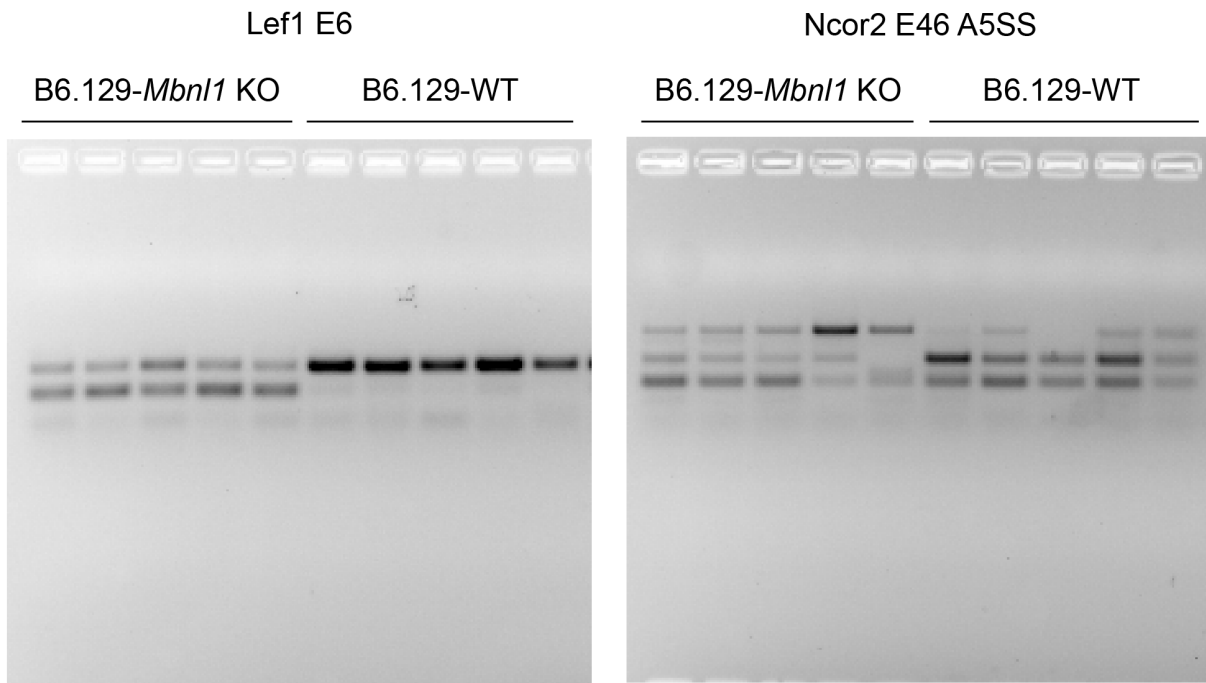

Lef1: 205 bp (+E6); 121 bp (-E6)  
Ncor2: 368 bp (+E46L); 227 bp (+E46S); 140 bp (-E46)

**Supplementary Fig. 5d**

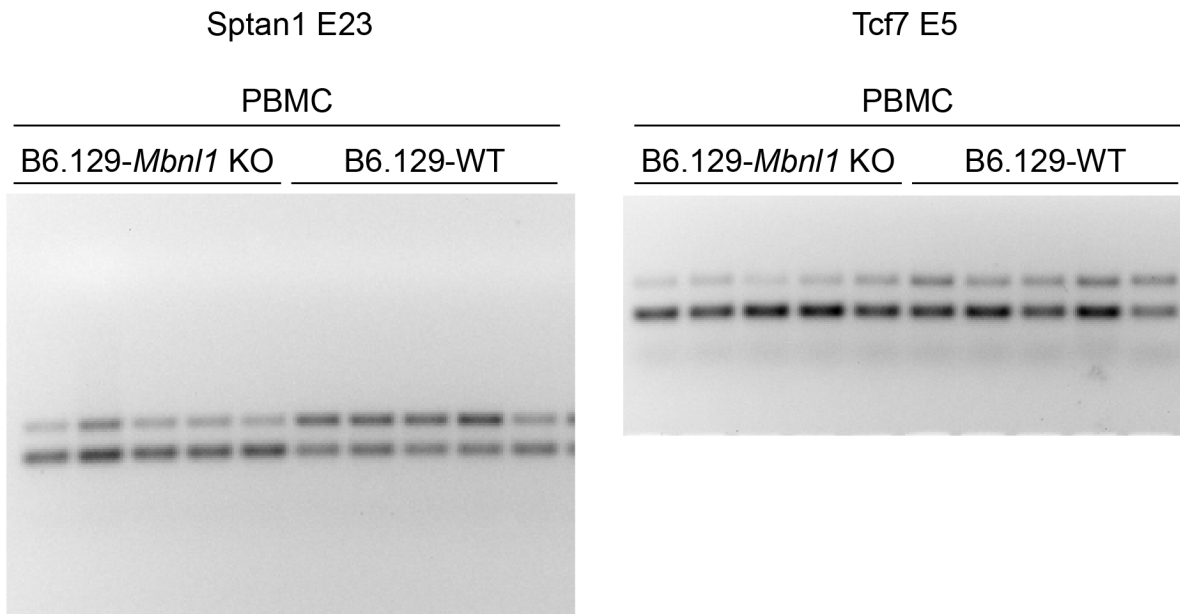

Sptan1: 185 bp (+E23); 125 bp (-E23)  
Tcf7: 206 bp (+E5); 113 bp (-E5)

Supplementary Fig. 5d

Sptan1 E23

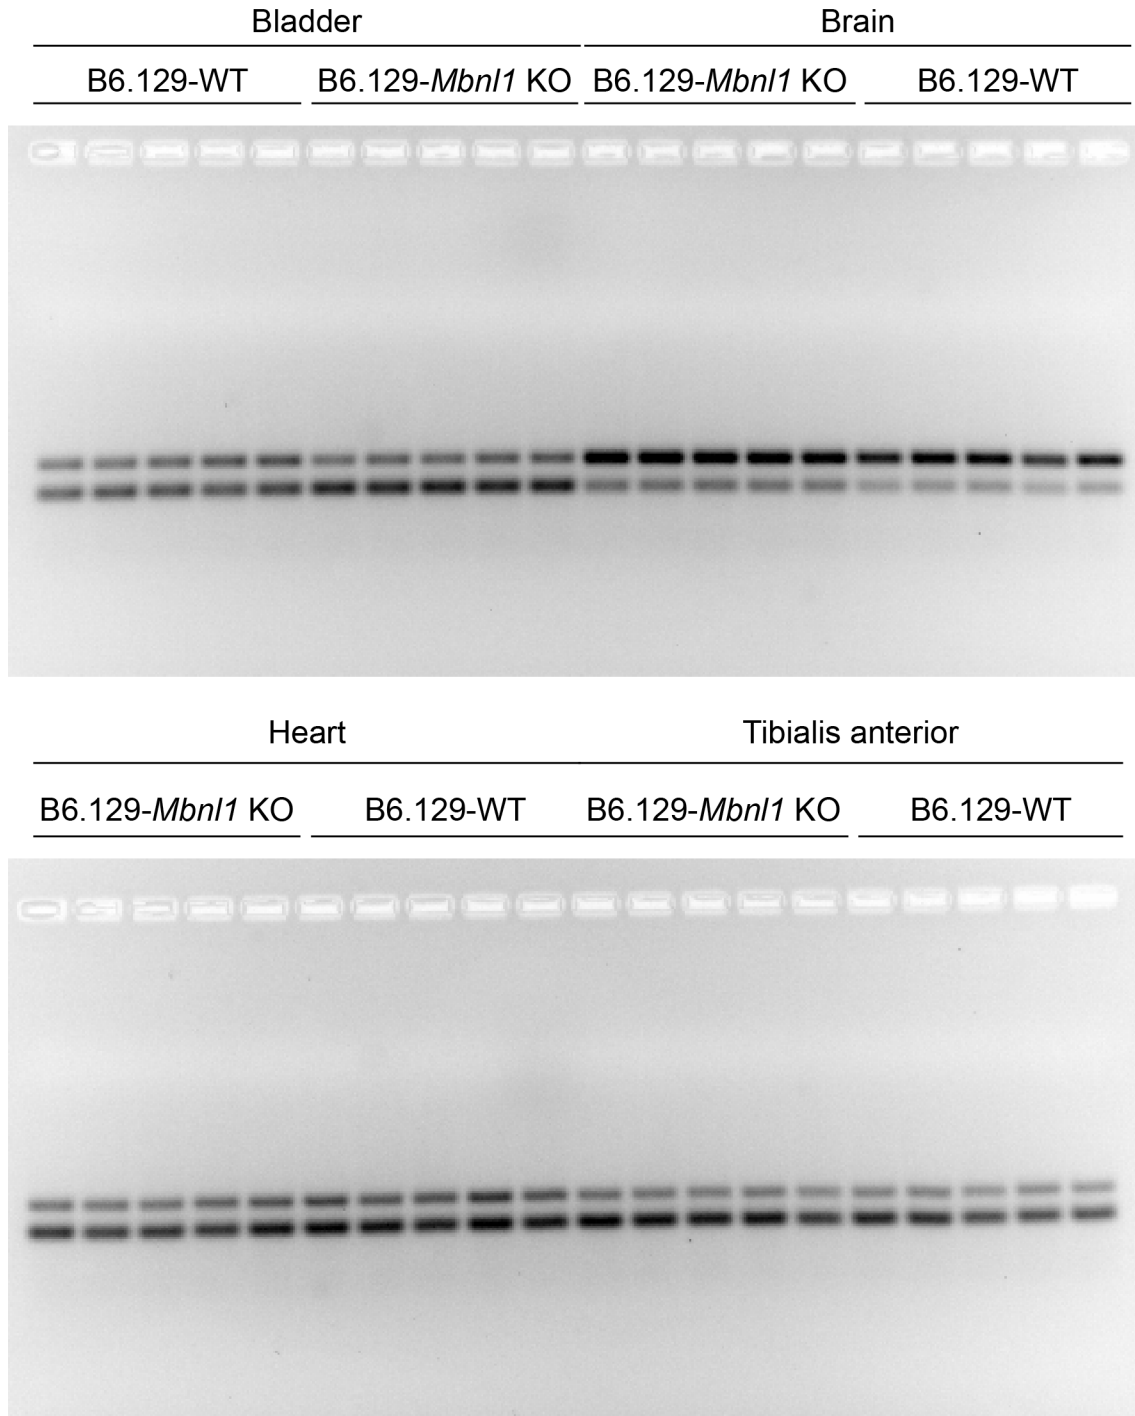

Sptan1: 185 bp (+E23); 125 bp (-E23)

Supplementary Fig. 5d

Tcf7 E5

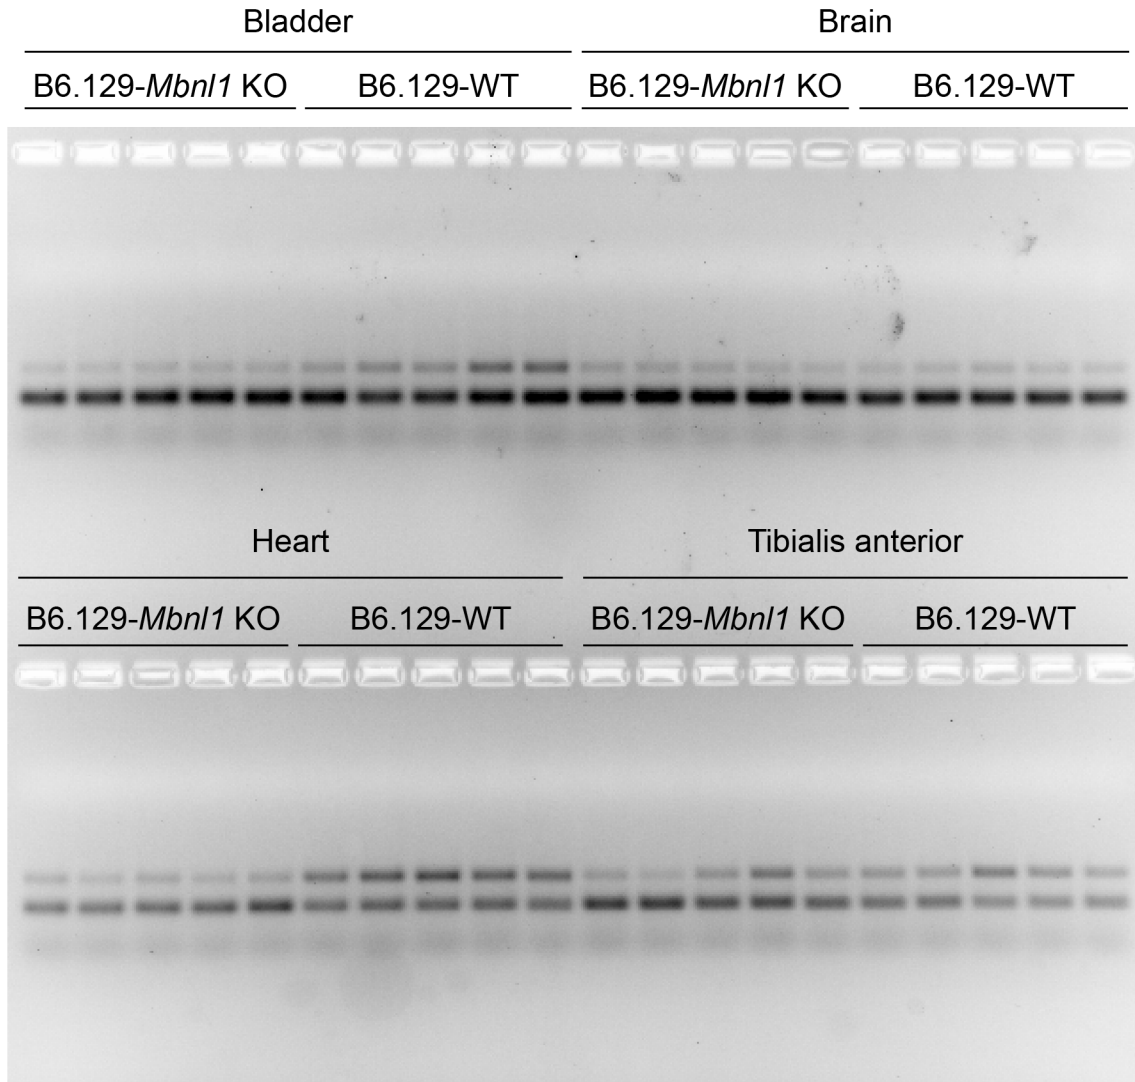

Tcf7: 206 bp (+E5); 113 bp (-E5)



Supplementary Fig. 5d

Lef1 E6

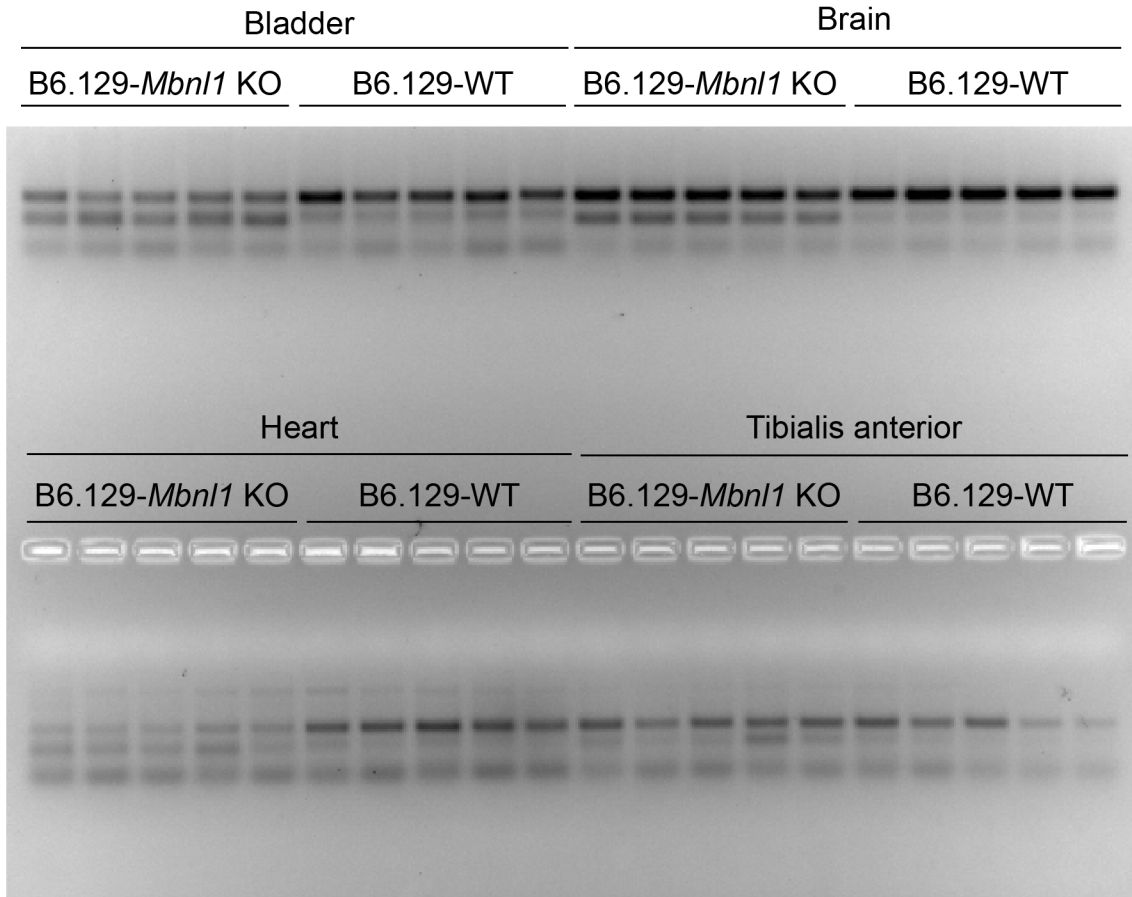

Lef1: 205 bp (+E6); 121 bp (-E6)

### Supplementary Fig. 5d

Ncor2 E46

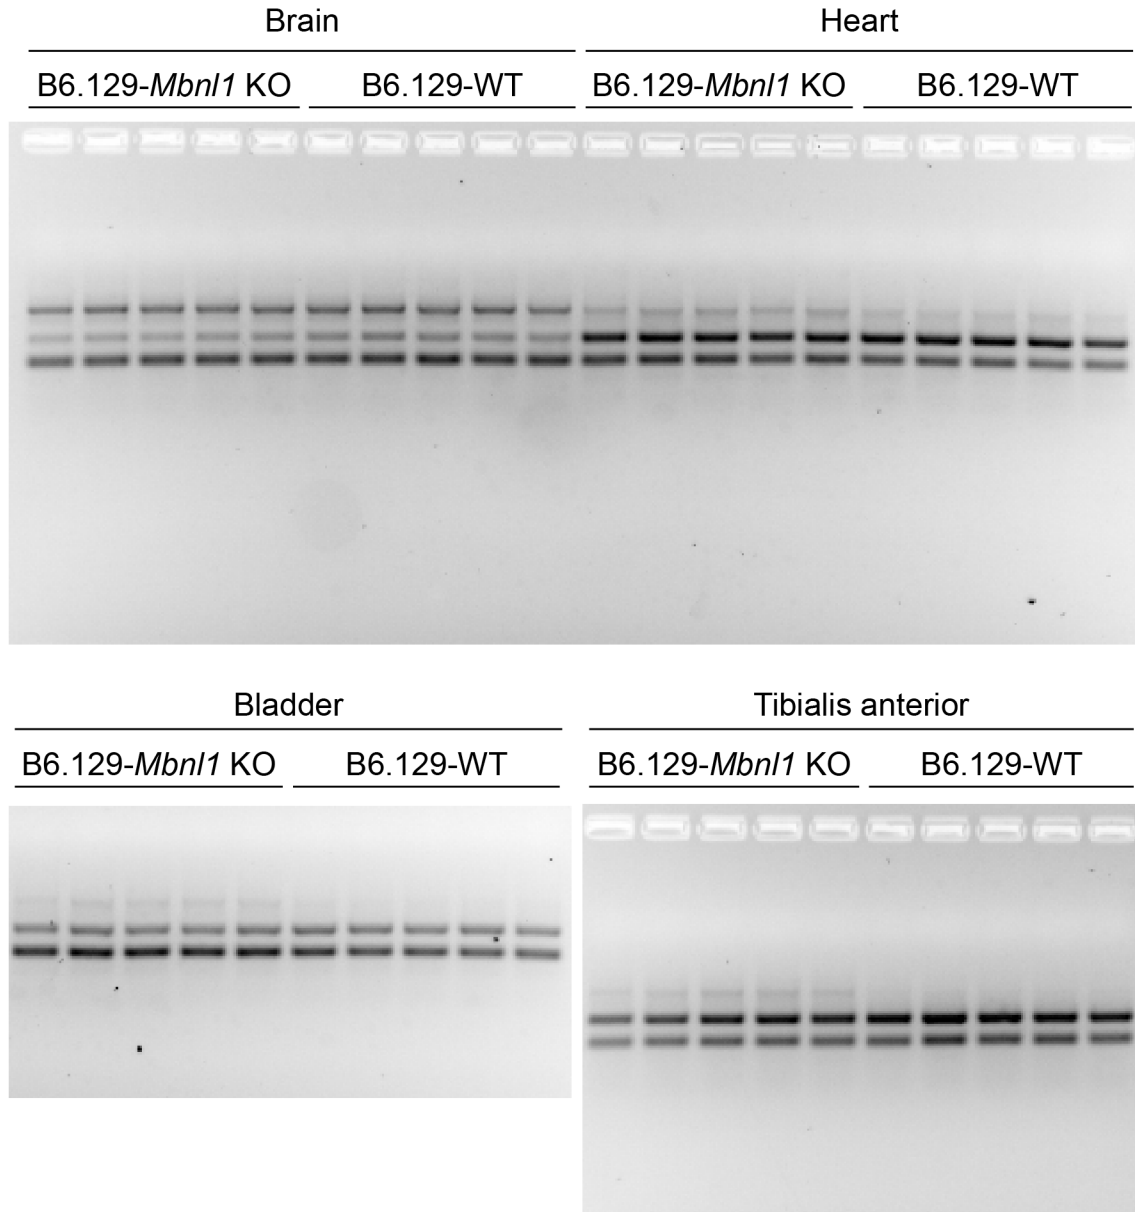

Ncor2: 368 bp (+E46L); 227 bp (+E46S); 140 bp (-E46)

### Supplementary Fig. 9b

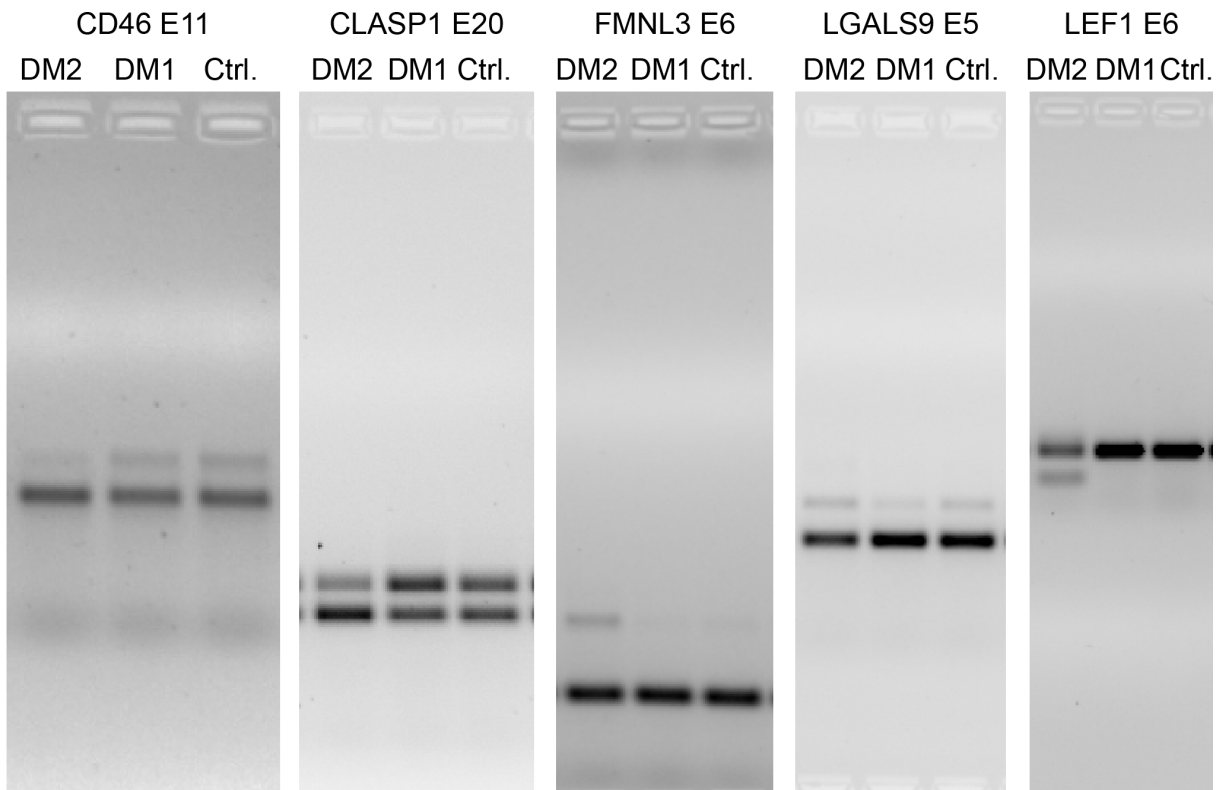

CD46: 318 bp (+E11); 225 bp (-E11)  
CLASP1: 182 bp (-E20), 230 bp (+E20)  
FMNL3: 303 bp (+E6); 150 bp (-E6)  
LGALS9: 318 bp (+E5); 222 bp (-E5)  
LEF1: 185 bp (+E6); 101 bp (-E6)

### Supplementary Fig. 9b

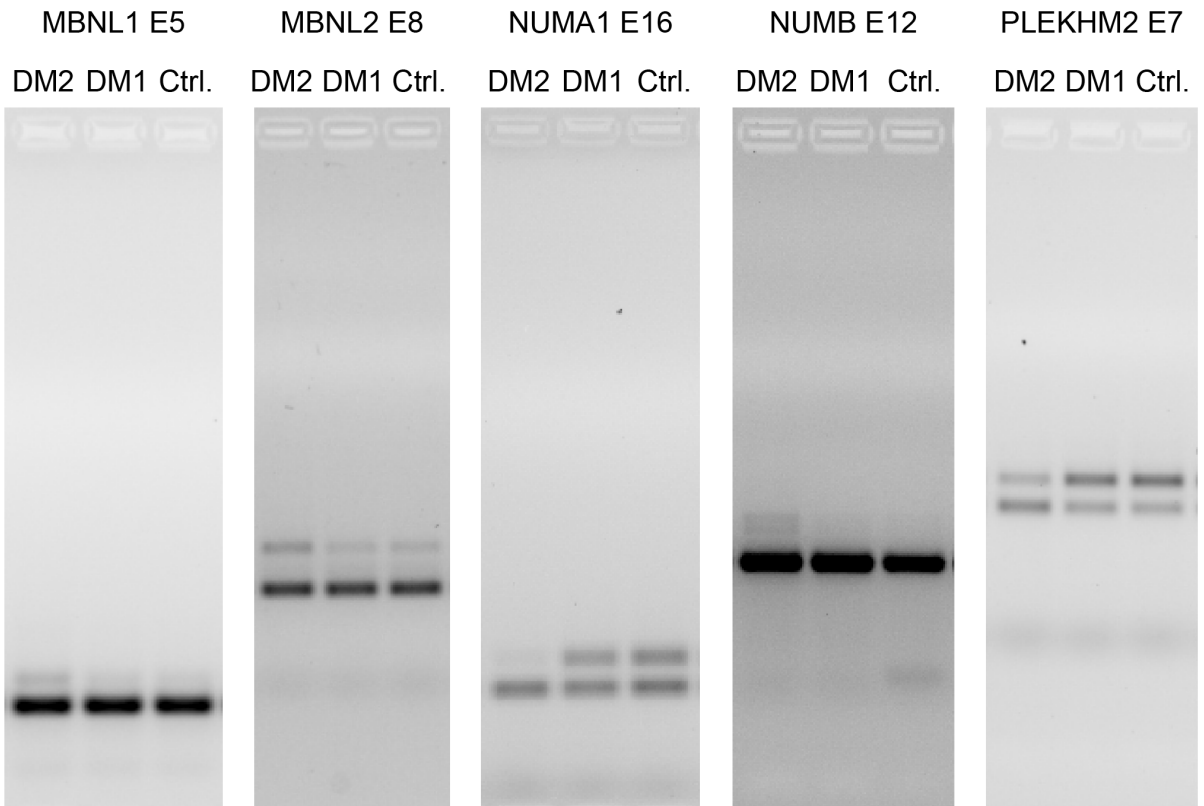

MBNL1: 270 bp (+E5); 216 bp (-E5)  
MBNL2: 317 bp (+E7+E8); 281 bp (-E7+E8); 222 bp (+E7-E8); 186 bp (-E7-E8)  
NUMA1: 184 bp (+E6); 142 bp (-E6)  
NUMB: 459 bp (+E12); 315 bp (-E12)  
PLEKHM2: 247 bp (+E7); 187 bp (-E7)

**Supplementary Fig. 9b**

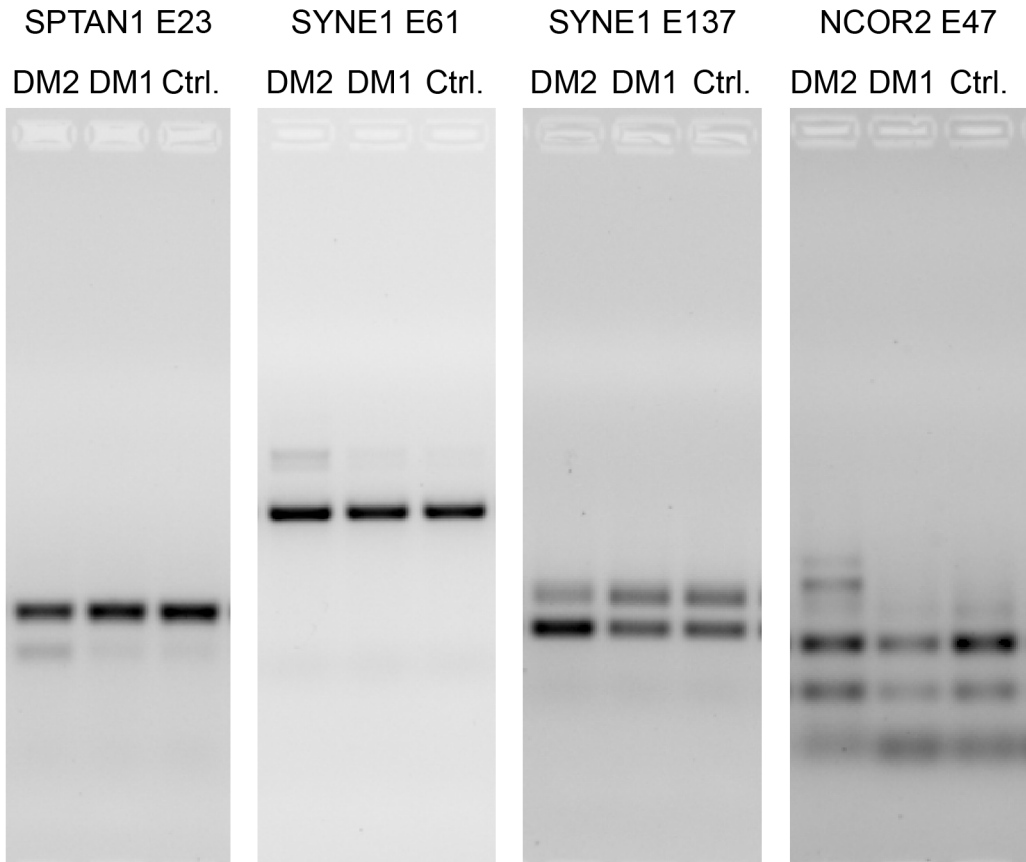

SPTAN1: 213 bp (+E23); 153 bp (-E23)  
SYNE1: 403 bp (+E61); 247 bp (-E61)  
SYNE1: 245 bp (+E137); 176 bp (-E137)  
NCOR2: 365 bp (+E47L); 227 bp (+E47S), 149 bp (-E47)
